# Supplementary material
Source: publisher figshare collection journal article supplement (https://sage.figshare.com/ndownloader/files/23425736)
Supplement: Supplementary file 1 [file 23425736]

# **ONLINE SUPPLEMENT**

## **APPENDIX 2**

### **STATISTICAL TESTS**

## **Appendix 2.1**

**Perceived risk and the incidence of intracranial hemorrhage according to center caseload and years of experience.**

**Hypothesis Test Summary**

|          | <b>Null Hypothesis</b>                                                             | <b>Test</b>                             | <b>Sig.</b> | <b>Decision</b>             |
|----------|------------------------------------------------------------------------------------|-----------------------------------------|-------------|-----------------------------|
| <b>1</b> | The distribution of risk_VV_likert is the same across categories of HighVolume.    | Independent-Samples Mann-Whitney U Test | .699        | Retain the null hypothesis. |
| <b>2</b> | The distribution of risk_VA_likert is the same across categories of HighVolume.    | Independent-Samples Mann-Whitney U Test | .068        | Retain the null hypothesis. |
| <b>3</b> | The distribution of risk_ECPR_likert is the same across categories of HighVolume.  | Independent-Samples Mann-Whitney U Test | .215        | Retain the null hypothesis. |
| <b>4</b> | The distribution of ICH_Incidence_ord is the same across categories of HighVolume. | Independent-Samples Mann-Whitney U Test | .790        | Retain the null hypothesis. |

Asymptotic significances are displayed. The significance level is .01.

### Hypothesis Test Summary

|   | Null Hypothesis                                                                         | Test                                    | Sig. | Decision                    |
|---|-----------------------------------------------------------------------------------------|-----------------------------------------|------|-----------------------------|
| 1 | The distribution of risk_VV_likert is the same across categories of LongEstablished.    | Independent-Samples Mann-Whitney U Test | .892 | Retain the null hypothesis. |
| 2 | The distribution of risk_VA_likert is the same across categories of LongEstablished.    | Independent-Samples Mann-Whitney U Test | .051 | Retain the null hypothesis. |
| 3 | The distribution of risk_ECPR_likert is the same across categories of LongEstablished.  | Independent-Samples Mann-Whitney U Test | .029 | Retain the null hypothesis. |
| 4 | The distribution of ICH_Incidence_ord is the same across categories of LongEstablished. | Independent-Samples Mann-Whitney U Test | .234 | Retain the null hypothesis. |

Asymptotic significances are displayed. The significance level is .01.

## **Appendix 2.2**

**Perceived risk of intracranial hemorrhage and the reported heparin bolus dose, heparin initial maintenance dose or test used to titrate.**

### **Spearman correlation**

|                  |                         |               |
|------------------|-------------------------|---------------|
|                  |                         | ICH Incidence |
| Heparin Bolus    | Correlation Coefficient | -0.033        |
|                  | Sig. (2-tailed)         | 0.75          |
|                  | N                       | 95            |
| Heparin Infusion | Correlation Coefficient | 0.112         |
|                  | Sig. (2-tailed)         | 0.293         |
|                  | N                       | 90            |

### **Hypothesis Test Summary**

|          | Null Hypothesis                                                                                 | Test                                    | Sig. | Decision                    |
|----------|-------------------------------------------------------------------------------------------------|-----------------------------------------|------|-----------------------------|
| <b>1</b> | The distribution of ICH_Incidence_ord is the same across categories of AnticoagulationStrategy. | Independent-Samples Kruskal-Wallis Test | .669 | Retain the null hypothesis. |

Asymptotic significances are displayed. The significance level is .01.

### Appendix 2.3

#### Anticoagulation management according to center caseload and years of experience.

**Hypothesis Test Summary**

|   | Null Hypothesis                                                                               | Test                                    | Sig. | Decision                    |
|---|-----------------------------------------------------------------------------------------------|-----------------------------------------|------|-----------------------------|
| 1 | The distribution of HeparinBolus_ordinal is the same across categories of LongEstablished.    | Independent-Samples Mann-Whitney U Test | .794 | Retain the null hypothesis. |
| 2 | The distribution of HeparinInfusion_ordinal is the same across categories of LongEstablished. | Independent-Samples Mann-Whitney U Test | .651 | Retain the null hypothesis. |

Asymptotic significances are displayed. The significance level is .05.

**Hypothesis Test Summary**

|   | Null Hypothesis                                                                          | Test                                    | Sig. | Decision                    |
|---|------------------------------------------------------------------------------------------|-----------------------------------------|------|-----------------------------|
| 1 | The distribution of HeparinBolus_ordinal is the same across categories of HighVolume.    | Independent-Samples Mann-Whitney U Test | .948 | Retain the null hypothesis. |
| 2 | The distribution of HeparinInfusion_ordinal is the same across categories of HighVolume. | Independent-Samples Mann-Whitney U Test | .561 | Retain the null hypothesis. |

Asymptotic significances are displayed. The significance level is .05.

**Appendix 2.4****Perceived risk of intracranial hemorrhage according to the blood product administration thresholds.**

|                           |                         | Perceived risk |         |        |
|---------------------------|-------------------------|----------------|---------|--------|
|                           |                         | VV-ECMO        | VA-ECMO | ECPR   |
| Platelet - normal         | Correlation Coefficient | -0.064         | -0.049  | 0.018  |
|                           | P-value. (2-tailed)     | 0.482          | 0.596   | 0.851  |
|                           | N                       | 124            | 121     | 115    |
| Platelet - ICH            | Correlation Coefficient | -0.042         | 0.083   | 0.037  |
|                           | P-value. (2-tailed)     | 0.643          | 0.365   | 0.7    |
|                           | N                       | 122            | 120     | 114    |
| FFP - normal              | Correlation Coefficient | -0.098         | -0.242  | -0.009 |
|                           | P-value. (2-tailed)     | 0.496          | 0.094   | 0.954  |
|                           | N                       | 50             | 49      | 46     |
| FFP - ICH                 | Correlation Coefficient | 0.032          | 0.004   | 0.057  |
|                           | P-value. (2-tailed)     | 0.799          | 0.972   | 0.662  |
|                           | N                       | 67             | 66      | 61     |
| Cryoprecipitates - normal | Correlation Coefficient | 0.009          | -0.137  | 0.041  |
|                           | P-value. (2-tailed)     | 0.945          | 0.281   | 0.755  |
|                           | N                       | 65             | 64      | 59     |
| Cryoprecipitates - ICH    | Correlation Coefficient | 0.194          | 0.11    | 0.19   |
|                           | P-value. (2-tailed)     | 0.086          | 0.336   | 0.102  |
|                           | N                       | 79             | 79      | 75     |

## **Appendix 2.5**

**Blood product administration triggers according to center caseload and years of experience.**

**Hypothesis Test Summary**

|          | <b>Null Hypothesis</b>                                                             | <b>Test</b>                             | <b>Sig.</b> | <b>Decision</b>             |
|----------|------------------------------------------------------------------------------------|-----------------------------------------|-------------|-----------------------------|
| <b>1</b> | The distribution of Hb_norm_ordinal is the same across categories of HighVolume.   | Independent-Samples Mann-Whitney U Test | .760        | Retain the null hypothesis. |
| <b>2</b> | The distribution of Hb_ICH_ordinal is the same across categories of HighVolume.    | Independent-Samples Mann-Whitney U Test | .309        | Retain the null hypothesis. |
| <b>3</b> | The distribution of Plt_norm_ordinal is the same across categories of HighVolume.  | Independent-Samples Mann-Whitney U Test | .776        | Retain the null hypothesis. |
| <b>4</b> | The distribution of Plt_ICH_ordinal is the same across categories of HighVolume.   | Independent-Samples Mann-Whitney U Test | .216        | Retain the null hypothesis. |
| <b>5</b> | The distribution of FFP_norm_ordinal is the same across categories of HighVolume.  | Independent-Samples Mann-Whitney U Test | .902        | Retain the null hypothesis. |
| <b>6</b> | The distribution of FFP_ICH_ordinal is the same across categories of HighVolume.   | Independent-Samples Mann-Whitney U Test | .832        | Retain the null hypothesis. |
| <b>7</b> | The distribution of Cryo_norm_ordinal is the same across categories of HighVolume. | Independent-Samples Mann-Whitney U Test | .691        | Retain the null hypothesis. |
| <b>8</b> | The distribution of Cryo_ICH_ordinal is the same across categories of HighVolume.  | Independent-Samples Mann-Whitney U Test | .233        | Retain the null hypothesis. |

Asymptotic significances are displayed. The significance level is .05.

### Hypothesis Test Summary

|   | Null Hypothesis                                                                         | Test                                    | Sig. | Decision                    |
|---|-----------------------------------------------------------------------------------------|-----------------------------------------|------|-----------------------------|
| 1 | The distribution of Hb_norm_ordinal is the same across categories of LongEstablished.   | Independent-Samples Mann-Whitney U Test | .398 | Retain the null hypothesis. |
| 2 | The distribution of Hb_ICH_ordinal is the same across categories of LongEstablished.    | Independent-Samples Mann-Whitney U Test | .139 | Retain the null hypothesis. |
| 3 | The distribution of Plt_norm_ordinal is the same across categories of LongEstablished.  | Independent-Samples Mann-Whitney U Test | .874 | Retain the null hypothesis. |
| 4 | The distribution of Plt_ICH_ordinal is the same across categories of LongEstablished.   | Independent-Samples Mann-Whitney U Test | .279 | Retain the null hypothesis. |
| 5 | The distribution of FFP_norm_ordinal is the same across categories of LongEstablished.  | Independent-Samples Mann-Whitney U Test | .721 | Retain the null hypothesis. |
| 6 | The distribution of FFP_ICH_ordinal is the same across categories of LongEstablished.   | Independent-Samples Mann-Whitney U Test | .414 | Retain the null hypothesis. |
| 7 | The distribution of Cryo_norm_ordinal is the same across categories of LongEstablished. | Independent-Samples Mann-Whitney U Test | .213 | Retain the null hypothesis. |
| 8 | The distribution of Cryo_ICH_ordinal is the same across categories of LongEstablished.  | Independent-Samples Mann-Whitney U Test | .101 | Retain the null hypothesis. |

Asymptotic significances are displayed. The significance level is .05.



## **Appendix 2.6**

**Oxygenation and Decarboxylation in targets according to center caseload and years of experience.**

**Hypothesis Test Summary**

|          | <b>Null Hypothesis</b>                                                                     | <b>Test</b>                             | <b>Sig.</b> | <b>Decision</b>             |
|----------|--------------------------------------------------------------------------------------------|-----------------------------------------|-------------|-----------------------------|
| <b>1</b> | The distribution of PaO2_target_VV_low_ord is the same across categories of HighVolume.    | Independent-Samples Mann-Whitney U Test | .939        | Retain the null hypothesis. |
| <b>2</b> | The distribution of PaO2_target_VA_low_ord is the same across categories of HighVolume.    | Independent-Samples Mann-Whitney U Test | .192        | Retain the null hypothesis. |
| <b>3</b> | The distribution of PaO2_target_ECPR_low_ord is the same across categories of HighVolume.  | Independent-Samples Mann-Whitney U Test | .255        | Retain the null hypothesis. |
| <b>4</b> | The distribution of PaO2_target_VV_high_ord is the same across categories of HighVolume.   | Independent-Samples Mann-Whitney U Test | .464        | Retain the null hypothesis. |
| <b>5</b> | The distribution of PaO2_target_VA_high_ord is the same across categories of HighVolume.   | Independent-Samples Mann-Whitney U Test | .262        | Retain the null hypothesis. |
| <b>6</b> | The distribution of PaO2_target_ECPR_high_ord is the same across categories of HighVolume. | Independent-Samples Mann-Whitney U Test | .318        | Retain the null hypothesis. |

Asymptotic significances are displayed. The significance level is .05.

### Hypothesis Test Summary

|   | Null Hypothesis                                                                                 | Test                                    | Sig. | Decision                    |
|---|-------------------------------------------------------------------------------------------------|-----------------------------------------|------|-----------------------------|
| 1 | The distribution of PaO2_target_VV_low_ord is the same across categories of LongEstablished.    | Independent-Samples Mann-Whitney U Test | .921 | Retain the null hypothesis. |
| 2 | The distribution of PaO2_target_VA_low_ord is the same across categories of LongEstablished.    | Independent-Samples Mann-Whitney U Test | .859 | Retain the null hypothesis. |
| 3 | The distribution of PaO2_target_ECPR_low_ord is the same across categories of LongEstablished.  | Independent-Samples Mann-Whitney U Test | .567 | Retain the null hypothesis. |
| 4 | The distribution of PaO2_target_VV_high_ord is the same across categories of LongEstablished.   | Independent-Samples Mann-Whitney U Test | .665 | Retain the null hypothesis. |
| 5 | The distribution of PaO2_target_VA_high_ord is the same across categories of LongEstablished.   | Independent-Samples Mann-Whitney U Test | .497 | Retain the null hypothesis. |
| 6 | The distribution of PaO2_target_ECPR_high_ord is the same across categories of LongEstablished. | Independent-Samples Mann-Whitney U Test | .424 | Retain the null hypothesis. |

Asymptotic significances are displayed. The significance level is .05.

## Appendix 2.7

Prognostic impression according to center caseload and years of experience.

**Hypothesis Test Summary**

|   | Null Hypothesis                                                                        | Test                                    | Sig. | Decision                    |
|---|----------------------------------------------------------------------------------------|-----------------------------------------|------|-----------------------------|
| 1 | The distribution of ICH_Incidence_ord is the same across categories of HighVolume.     | Independent-Samples Mann-Whitney U Test | .790 | Retain the null hypothesis. |
| 2 | The distribution of ICH_incidence_ordinal is the same across categories of HighVolume. | Independent-Samples Mann-Whitney U Test | .790 | Retain the null hypothesis. |
| 3 | The distribution of ICH_global_ordinal is the same across categories of HighVolume.    | Independent-Samples Mann-Whitney U Test | .222 | Retain the null hypothesis. |

Asymptotic significances are displayed. The significance level is .05.

**Hypothesis Test Summary**

|   | Null Hypothesis                                                                             | Test                                    | Sig. | Decision                    |
|---|---------------------------------------------------------------------------------------------|-----------------------------------------|------|-----------------------------|
| 1 | The distribution of ICH_Incidence_ord is the same across categories of LongEstablished.     | Independent-Samples Mann-Whitney U Test | .234 | Retain the null hypothesis. |
| 2 | The distribution of ICH_incidence_ordinal is the same across categories of LongEstablished. | Independent-Samples Mann-Whitney U Test | .234 | Retain the null hypothesis. |
| 3 | The distribution of ICH_global_ordinal is the same across categories of LongEstablished.    | Independent-Samples Mann-Whitney U Test | .706 | Retain the null hypothesis. |

Asymptotic significances are displayed. The significance level is .05.
